# Supplementary material
Source: HighWire-hosted journal article supplement (https://bmjopen.bmj.com/content/14/3/e076978)
Supplement: inline-supplementary-material-1 [file inline-supplementary-material-1.pdf]

Appendix I: Search strategy

MEDLINE (PubMed). Search conducted on June 12th, 2023

| Search | Query                                                                                                                                                                                                                                                                                                                                                                                                                                                                                                                                                                 | Records retrieved |
|--------|-----------------------------------------------------------------------------------------------------------------------------------------------------------------------------------------------------------------------------------------------------------------------------------------------------------------------------------------------------------------------------------------------------------------------------------------------------------------------------------------------------------------------------------------------------------------------|-------------------|
| #1     | "Constipation"[Mesh] OR (constipat*[TI]) OR (dyschezia[TI]) OR (colonic inertia[TI])                                                                                                                                                                                                                                                                                                                                                                                                                                                                                  | 17,419            |
| #2     | "Patient Reported Outcome Measures"[MeSH Terms] OR "Weights and Measures"[MeSH Terms] OR "measure*" [Title] OR "Risk Assessment"[MeSH Terms] OR "Risk Management"[MeSH Terms] OR "risk assessment*" [Title] OR "Risk Management" [Title] OR "Equipment and Supplies"[Mesh] OR "Surveys and Questionnaires"[Mesh] OR "Survey*" [Title] OR "Questionnaire" [Title] OR "Quality Indicators, Health Care"[Mesh] OR "Psychometrics"[Mesh] OR "psychometric" [Title] OR "instrument" [Title] OR "index" [Title] OR "inventory" [Title] OR "tool" [Title] OR "scale" [Title] | 3,917,864         |
| #3     | #1 AND #2                                                                                                                                                                                                                                                                                                                                                                                                                                                                                                                                                             | 2,544             |

Appendix II: Data extraction instrument

|                                                                                                                                                           |  |
|-----------------------------------------------------------------------------------------------------------------------------------------------------------|--|
| Details and characteristics of the paper                                                                                                                  |  |
| Reviewer, date of review                                                                                                                                  |  |
| Citation details (e.g., author/s, date, title, journal, volume, issue, pages)                                                                             |  |
| Country/s of origin                                                                                                                                       |  |
| Type (e.g., scientific or academic journals, books)                                                                                                       |  |
| Aim/purpose of the paper                                                                                                                                  |  |
| Study design                                                                                                                                              |  |
| Characteristics of the tool extracted from the paper                                                                                                      |  |
| • Name of the tool                                                                                                                                        |  |
| • Aim                                                                                                                                                     |  |
| • Scope (e.g., evaluating severity of constipation)                                                                                                       |  |
| • Definition of constipation (e.g., according to the ROME definition. Specify which criteria were excluded from the definition if not all were included.) |  |
| • Content                                                                                                                                                 |  |
| ○ Patient symptoms measured, y/n                                                                                                                          |  |
| ○ List most frequent patient symptoms                                                                                                                     |  |
| ○ Stool consistency measured, y/n                                                                                                                         |  |
| • Structure                                                                                                                                               |  |
| ○ Number of scales, n                                                                                                                                     |  |
| ○ Number of subscales, n                                                                                                                                  |  |
| ○ Number of items                                                                                                                                         |  |
| Mode of completion (e.g., patient-reported, clinician-reported, or family/carer-reported)                                                                 |  |
| Administration time                                                                                                                                       |  |
| Context (clinical/educational/ research)                                                                                                                  |  |
| Setting (e.g., type of clinical setting)                                                                                                                  |  |
| Participants                                                                                                                                              |  |
| ○ number                                                                                                                                                  |  |
| ○ diagnosis                                                                                                                                               |  |
| ○ age                                                                                                                                                     |  |
| ○ sex                                                                                                                                                     |  |
| ○ other                                                                                                                                                   |  |

Appendix III: Presentation table

|                                                           | [Name of tool1] | [Name of tool2] | [Name of tool3] |
|-----------------------------------------------------------|-----------------|-----------------|-----------------|
| Papers investigating the tool                             |                 |                 |                 |
| Characteristics of the tools                              |                 |                 |                 |
| Aim of the tool                                           |                 |                 |                 |
| Scope of tool (e.g., evaluating severity of constipation) |                 |                 |                 |
| Definition of constipation                                |                 |                 |                 |
| Contents of tool                                          |                 |                 |                 |
| Patient symptoms measured, y/n                            |                 |                 |                 |
| List most frequent patient symptoms                       |                 |                 |                 |
| Stool consistency measured, y/n                           |                 |                 |                 |
| Structure of tool                                         |                 |                 |                 |
| Number of scales, n                                       |                 |                 |                 |
| Number of subscales, n                                    |                 |                 |                 |
| Number of items                                           |                 |                 |                 |
| Mode of completion                                        |                 |                 |                 |
| Healthcare professional/self-reported/family-carer        |                 |                 |                 |
| Administration time, minutes                              |                 |                 |                 |
| Study setting(s) for use of tool (country)                |                 |                 |                 |
| Study population(s) (diagnosis, age, sex)                 |                 |                 |                 |
| Implemented in clinical practice, y/n                     |                 |                 |                 |
| If yes, where                                             |                 |                 |                 |
| Educational purposes, y/n                                 |                 |                 |                 |
| If yes, where                                             |                 |                 |                 |
| Research purposes, y/n                                    |                 |                 |                 |
| If yes, number                                            |                 |                 |                 |
